# Supplementary material for: Alu element in the RNA binding motif protein, X-linked 2 (RBMX2) gene found to be linked to bipolar disorder
Source: PubMed Central journal article supplement (PMC8675739; doi:10.1371/journal.pone.0261170), 2021-12-16

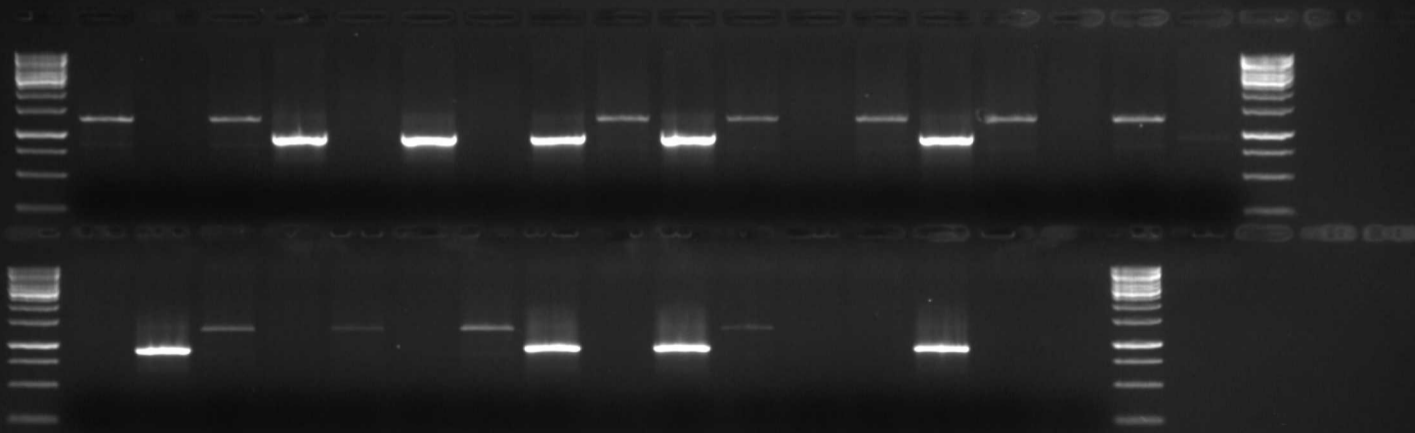

Supplement: pone.0261170.s001.pdf [file pone.0261170.s001.pdf]
